# Supplementary material for: Screening populations for copy number variation using genotyping-by-sequencing: a proof of concept using soybean fast neutron mutants
Source: BMC Genomics. 2019 Aug 6;20:634. doi: 10.1186/s12864-019-5998-1 (PMC6683502; doi:10.1186/s12864-019-5998-1)
Supplement: Supplementary file 4 — Copy number of templates amplified by 37 primer pairs in mutant and control lines as assessed by a ddPCR assay. ID: the identifier of the mutant; CNV_type: the type of CNV (homdel = homozygous deletion, hetdel = hemizygous deletion, dup = duplication); chr: the chromosome on which the CNV is located; start: the starting position of the CNV; end: the end position of the CNV; primer_pair: the identifier of the primer pair that was used for that assay; mutant_conc: the concentration (in number of DNA templates per μl) measured in the mutant for that assay; mutant_ref: the concentration (in number of DNA templates per μl) measured using reference primer pair BY in that mutant; mutant_n: the copy number of the templates amplified by primer_pair in the mutant as determined by dividing mutant_conc by mutant_ref; control_conc: the concentration (in number of DNA templates per μl) measured in the control for that assay; control_ref: the concentration (in number of DNA templates per μl) measured using reference primer pair BY in the control; control_n: the copy number of the templates amplified by primer_pair in the control as determined by dividing control_conc by control_ref; ratio: the ratio of the copy number of the mutant to the copy number of the control for the templates amplified by primer_pair. (CSV 4 kb) [file 12864_2019_5998_MOESM4_ESM.csv]

ID	CNV_type	chr	start	end	primer_pair	mutant_conc	mutant_ref	mutant_n	control_conc	control_ref	control_n	ratio
FNMN0032	dup	Chr07	26682000	27265000	AP	208	207	2.00966183574879	208	218	1.90825688073395	1.05314009661836
FNMN0044	dup	Chr16	17739000	18321000	BK	1210	186	13.010752688172	1225	218	11.2385321100917	1.15769146368225
FNMN0044	dup	Chr16	17739000	18321000	CC	2860	186	30.752688172043	2480	218	22.7522935779816	1.35163024627125
FNMN0072	dup	Chr11	5512000	5623000	AY	357	183	3.90163934426229	210	218	1.92660550458716	2.02513661202186
FNMN0088	dup	Chr11	28891000	29377000	BB	352	186	3.78494623655914	189	218	1.73394495412844	2.18285259145474
FNMN0013	hetdel	Chr18	32517000	32876000	BP	84.2	185	0.91027027027027	198	218	1.81651376146789	0.501108381108381
FNMN0015	hetdel	Chr18	32169000	32913000	BP	104.2	210	0.992380952380952	198	218	1.81651376146789	0.546310726310726
FNMN0017	hetdel	Chr01	29463000	30946000	AA	183	163	2.24539877300613	408	218	3.74311926605505	0.599873691808012
FNMN0017	hetdel	Chr01	29463000	30946000	AB	0	163	0	209	218	1.91743119266055	0
FNMN0043	hetdel	Chr12	2000	106000	BC	172	177	1.94350282485876	208	218	1.90825688073395	1.01847023033464
FNMN0051	hetdel	Chr01	47307000	47753000	AE	178	183	1.94535519125683	399	218	3.6605504587156	0.531437884328307
FNMN0051	hetdel	Chr01	47307000	47753000	AF	0.6	183	0.00655737704918033	250	218	2.29357798165138	0.00285901639344262
FNMN0053	hetdel	Chr19	44905000	45215000	BQ	89	176	1.01136363636364	198	218	1.81651376146789	0.556760789715335
FNMN0074	hetdel	Chr05	20935000	22177000	AL	91	176	1.03409090909091	197	218	1.80733944954128	0.572161975080757
FNMN0089	hetdel	Chr13	1460000	2206000	BE	90	163	1.10429447852761	192	218	1.76146788990826	0.62691717791411
FNMN0012	homdel	Chr14	14436000	14508000	BI	46.5	187	0.497326203208556	206	218	1.88990825688073	0.263148330823945
FNMN0012	homdel	Chr14	14436000	14508000	BZ	0	187	0	195	218	1.78899082568807	0
FNMN0017	homdel	Chr08	9450000	9458000	AR	150	163	1.84049079754601	210	218	1.92660550458716	0.955302366345311
FNMN0017	homdel	Chr08	9450000	9458000	AS	163	163	2	198	218	1.81651376146789	1.1010101010101
FNMN0038	homdel	Chr01	47907000	47936000	AH	188	176	2.13636363636364	192	218	1.76146788990826	1.21283143939394
FNMN0038	homdel	Chr01	47907000	47936000	CB	174	176	1.97727272727273	211	218	1.93577981651376	1.02143472641103
FNMN0038	homdel	Chr09	39115000	39202000	AU	142	176	1.61363636363636	188	218	1.72477064220183	0.935565764023211
FNMN0038	homdel	Chr09	39115000	39202000	AV	219	176	2.48863636363636	295	218	2.70642201834862	0.919530046224961
FNMN0038	homdel	Chr13	23112000	23126000	BG	173	176	1.96590909090909	194	218	1.77981651376147	1.10455716963449
FNMN0038	homdel	Chr13	23112000	23126000	BH	182	176	2.06818181818182	199	218	1.8256880733945	1.13282320694381
FNMN0038	homdel	Chr16	33120000	33137000	BL	176	176	2	190	218	1.74311926605505	1.14736842105263
FNMN0038	homdel	Chr16	33120000	33137000	BM	328	176	3.72727272727273	310	218	2.84403669724771	1.31055718475073
FNMN0057	homdel	Chr05	29564000	29766000	AM	182	185	1.96756756756757	403	218	3.69724770642202	0.532170880557977
FNMN0057	homdel	Chr05	29564000	29766000	AN	78.1	185	0.844324324324324	358	218	3.28440366972477	0.25707081383059
FNMN0064	homdel	Chr06	47068000	47086000	AO	1345	142	18.943661971831	1832	218	16.8073394495413	1.12710652561658
FNMN0064	homdel	Chr06	47068000	47086000	CD	3660	142	51.5492957746479	11400	218	104.587155963303	0.49288361749444
FNMN0086	homdel	Chr17	31528000	31674000	BN	0.73	176	0.00829545454545455	189	218	1.73394495412844	0.00478415103415103
FNMN0086	homdel	Chr17	31528000	31674000	BO	200	176	2.27272727272727	354	218	3.24770642201835	0.699794555726759
M92-220-Long_R6-1	homdel	Chr02	21966000	22879000	AI	519	178	5.8314606741573	780	218	7.15596330275229	0.814909248055316
M92-220-Long_R6-1	homdel	Chr02	21966000	22879000	AJ	17.5	178	0.196629213483146	202	218	1.85321100917431	0.106101902325064
M92-220-Long_R6-1	homdel	Chr09	13714000	14037000	AT	330	178	3.70786516853933	542	218	4.97247706422018	0.745677681495916
M92-220-Long_R6-1	homdel	Chr09	13714000	14037000	CA	1030	178	11.5730337078652	557	218	5.11009174311927	2.26474088717649
